# Supplementary material for: South American freshwater fish diversity shaped by Andean uplift since the Late Cretaceous
Source: bioRxiv or medRxiv preprint supplement (doi:10.1101/2021.05.14.444133), 2021-05-16
Supplement: Supplementary file [file media-1.pdf]

Supplementary materials for

**South American freshwater fish diversity shaped by Andean uplift since  
the Late Cretaceous**

Lydian M. Boschman, Fernanda A.S. Cassemiro, Luca Carraro, Jorad de Vries, Florian Altermatt, Oskar Hagen, Carina Hoorn, Loïc Pellissier

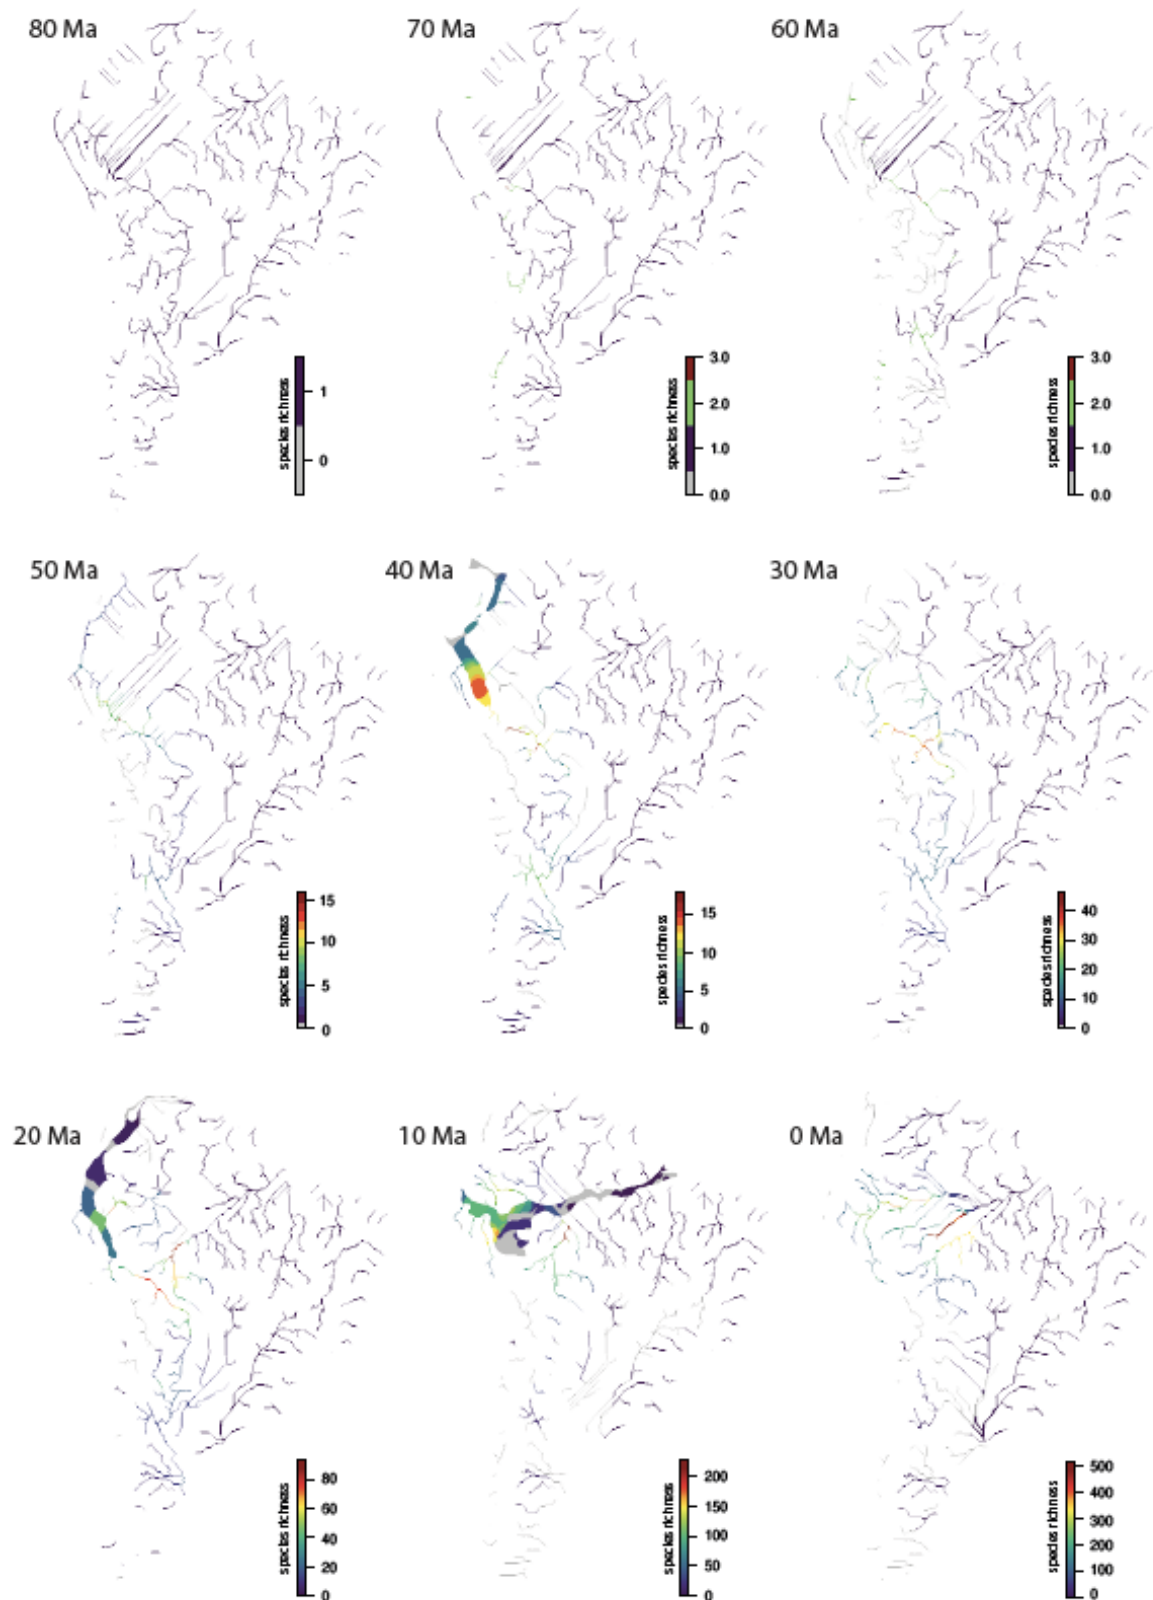

**Fig. S1 | Example of a gen3sis simulation.** Snapshots at 80, 70, 60, 50, 40, 30, 20, 10 and 0 Ma; results of richness per sub-basin shown in Fig. 3c.

river size exploration

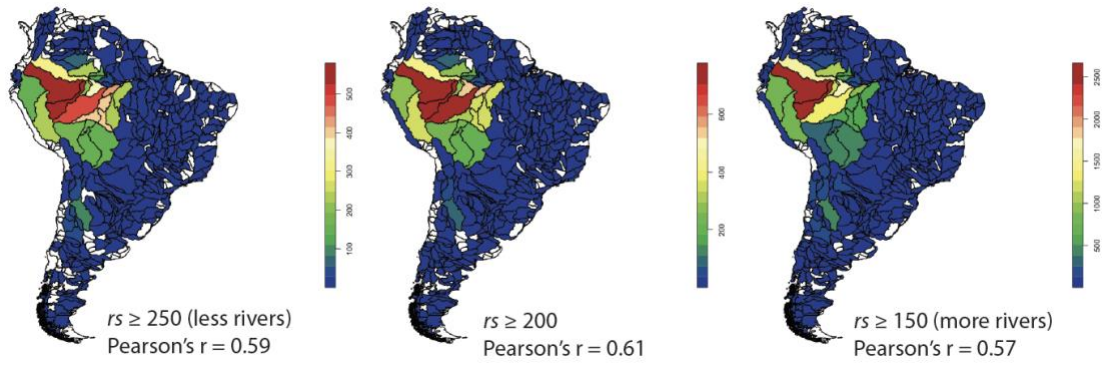

**Fig. S2 | Parameter exploration: river size ( $rs$ ).**  $d = 5$ ,  $div = 2$ .

divergence threshold exploration

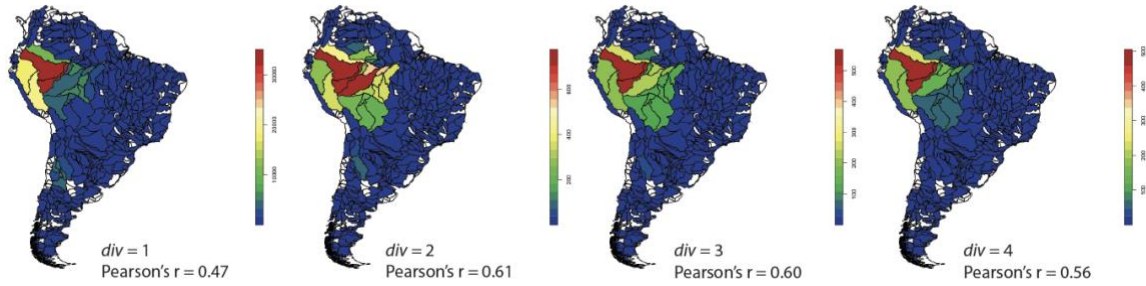

**Fig. S3 | Parameter exploration: divergence threshold ( $div$ ).**  $d = 5$ ,  $rs = 200$ .

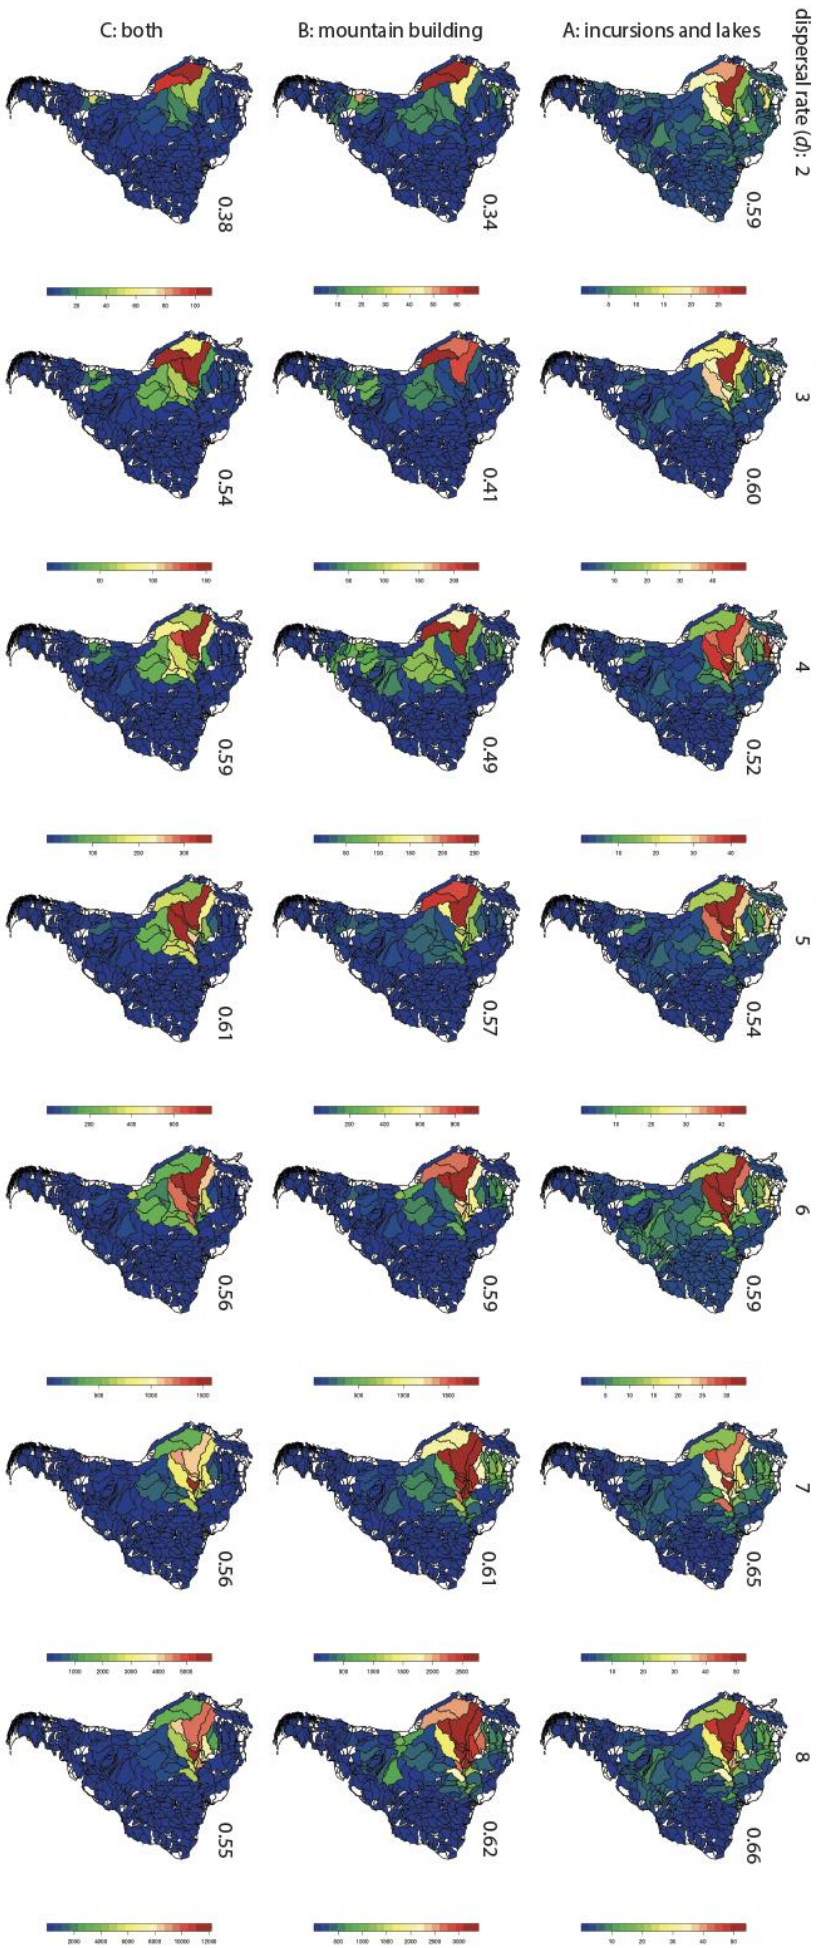

Fig. S4 | Parameter exploration: dispersal rate ( $d$ ).  $div = 2$ ,  $rs = 200$ . Numbers are Pearson's  $r$ .

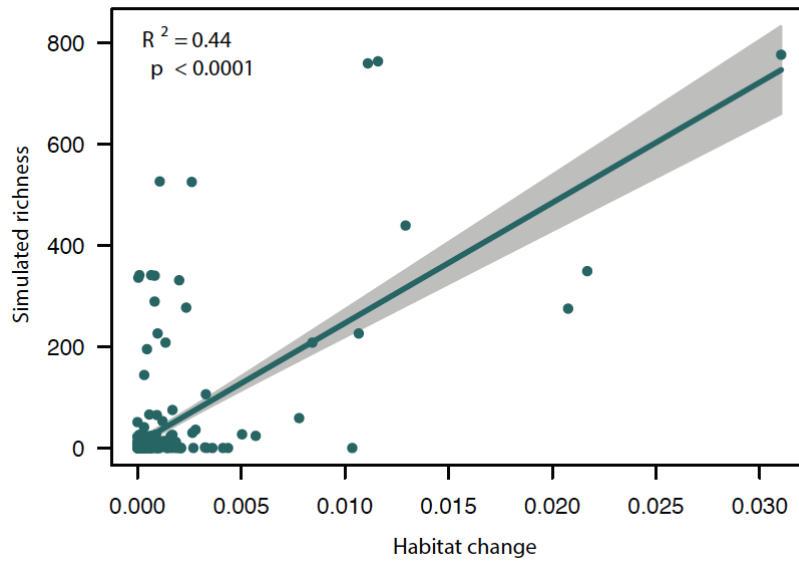

**Fig. S5 | Simulated richness versus cumulative habitat change of sub-basins.** Cumulative habitat change per sub-basin (shown in Fig. 2) is a measure of the amount of cells changing from suitable to unsuitable habitat, or vice versa, summed for all 80 time steps.

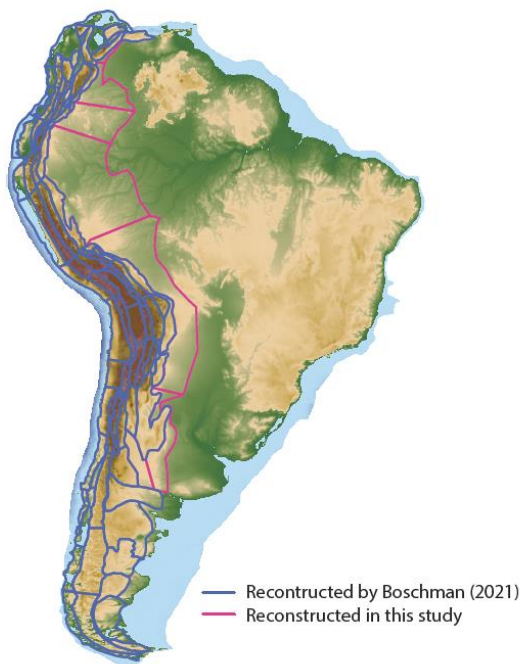

**Fig. S6 | Map of South America, outlining the area in which elevation is reconstructed by the study of Boschman<sup>1</sup>, and this study.**

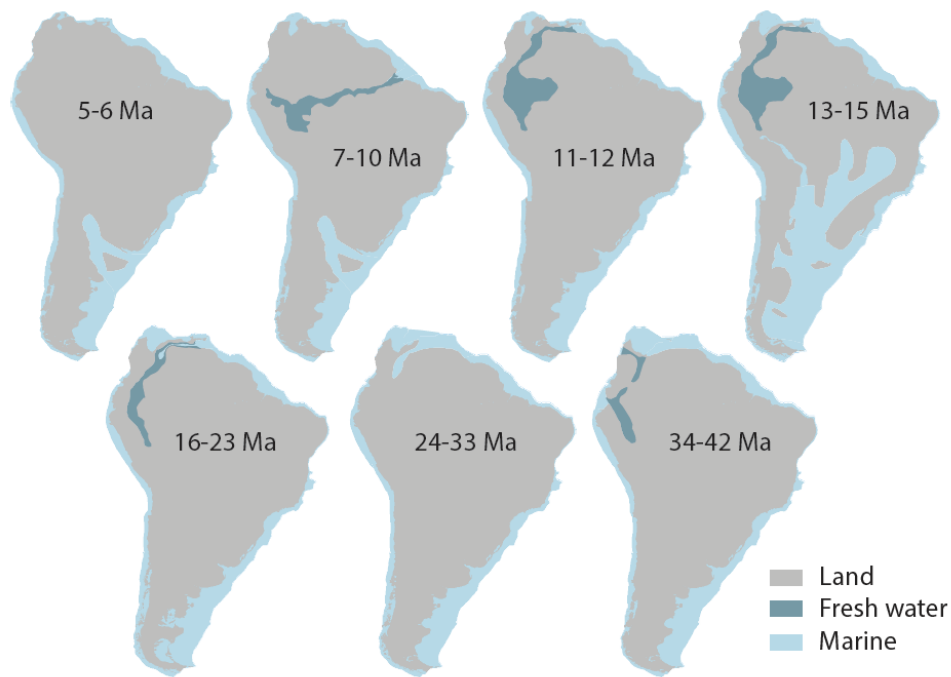

**Fig. S7 | Outlines of lakes and marine incursions included in the reconstruction, based on the maps of Hoorn and Wesseling<sup>2</sup> for northern South America and Hernández, et al.<sup>3</sup> for southern South America.**

- 1 Boschman, L. M. Andean mountain building since the Late Cretaceous: A paleoelevation reconstruction. *Earth-Science Reviews*, doi:10.1016/j.earscirev.2021.103640 (2021).
- 2 Hoorn, C. & Wesselingh, F. *Amazonia: landscape and species evolution: a look into the past*. (John Wiley & Sons, 2011).
- 3 Hernández, R. *et al.* Age, distribution, tectonics, and eustatic controls of the Paranense and Caribbean marine transgressions in southern Bolivia and Argentina. *Journal of South American Earth Sciences* **19**, 495-512 (2005).
